# Supplementary material
Source: PubMed Central journal article supplement (PMC5785798)
Supplement: blood776773-suppl1.pdf [file blood776773-suppl1.pdf]

**Supplementary table S1**

|                       |                               |                        |      |      |      |      |      |      | Sequence identity |            |
|-----------------------|-------------------------------|------------------------|------|------|------|------|------|------|-------------------|------------|
| Human                 | <i>Homo sapiens</i>           | <a href="#">Q7LDG7</a> | F181 | Y289 | C296 | G305 | N330 | A345 | CalDAG-GEFI       | Just CDC25 |
| Chimpanzee            | <i>Pan troglodytes</i>        | <a href="#">H2Q404</a> | F181 | Y289 | C296 | G305 | N330 | A345 | 99.67%            | 100%       |
| Macaque               | <i>Macaca mulatta</i>         | <a href="#">H9ENK8</a> | F181 | Y289 | C296 | G305 | N330 | A345 | 99.84%            | 100%       |
| Dog                   | <i>Canis lupus familiaris</i> | <a href="#">J9P904</a> | F235 | Y343 | C350 | G359 | N384 | A409 | 88.08%            | 98.30%     |
| Cow                   | <i>Bos taurus</i>             | <a href="#">F1MJ35</a> | F181 | Y289 | C296 | G305 | N330 | A345 | 96.55%            | 96.60%     |
| Mouse                 | <i>Mus musculus</i>           | <a href="#">Q9QUG9</a> | F181 | Y289 | C296 | G305 | N330 | A345 | 96.22%            | 97.00%     |
| Rat                   | <i>Rattus norvegicus</i>      | <a href="#">P0C643</a> | F181 | Y289 | C296 | G305 | N330 | A345 | 96.88%            | 97.90%     |
| Zebrafish             | <i>Danio rerio</i>            | <a href="#">F1R763</a> | F175 | Y283 | C290 | G299 | N324 | A339 | 58.95%            | 69.70%     |
| Xenopus               | <i>Xenopus laevis</i>         | <a href="#">Q32N25</a> | F176 | Y284 | C291 | G300 | N325 | T340 | 63.05%            | 70.50%     |
| <b>% conservation</b> |                               |                        | 100% | 100% | 100% | 100% | 100% | 89%  |                   |            |

**Conservation of the human CalDAG-GEFI residues F181, Y289, C296, G305, N330 and A345 in orthologs.** The amino acid sequence of human CalDAG-GEFI was compared to orthologs using CLUSTAL Omega (<http://www.ebi.ac.uk/Tools/msa/clustalo/>). The CDC25 sequence is more conserved across orthologs when compared to the sequence across all of the CalDAG-GEFI domains. All the substituted residues predicted from the observed likely pathogenic missense variants in the study were completely conserved with the exception of human residue A345 which is a T residue in *Xenopus*.

**Supplementary table S2**

|                          | A-II3     | B-II1         | C-II1    | D-II2      | E-II1              | F-II1      | G-II2      | H-II4              | I-II1              | J-II2       | K-II1    |
|--------------------------|-----------|---------------|----------|------------|--------------------|------------|------------|--------------------|--------------------|-------------|----------|
| Variant                  | N67Lfs*24 | E260* / C296R | N330K    | R494Afs*54 | R494Afs*54 / F181S | F497Sfs*22 | F497Sfs*22 | F497Sfs*22 / A345P | F497Sfs*22 / Y289C | G305D       | P125*    |
| Sex                      | F         | F             | F        | M          | M                  | F          | M          | M                  | M                  | M           | F        |
| Ethnicity*               | European  | Other         | Other    | European   | European           | European   | African    | European           | European           | South Asian | European |
| Recruiting country       | France    | France        | Israel   | France     | USA                | Belgium    | France     | UK                 | UK                 | Argentina   | UK       |
| Collection               | NBR       | NBR           | NBR      | NBR        | NBR                | NBR        | NBR        | NBR                | TG                 | TG          | TG       |
| Year of birth            | 1994      | 1997          | 1996     | 1957       | 2004               | 1993       | NK         | 1960               | 1956               | NK          | 1993     |
| Presentation age (y)     | 1         | 1             | 5        | 5          | 1                  | 1          | 14         | 5                  | 4                  | NK          | 2        |
| Blood products           | PLT       | None          | RBC, PLT | NK         | RBC, PLT           | RBC, PLT   | NK         | None               | PLT                | RBC         | RBC, PLT |
| PLT (10 <sup>9</sup> /L) | 226       | 443           | 304      | 282        | 223                | 209        | NK         | 200                | 322                | 196         | 197      |
| MPV (fL)                 | 7.8       | 7.3           | 7.4      | 10.2       | 9.9                | 9.8        | NK         | 9.1                | 10.4               | 9.7         | 12.3     |
| ADP Agg                  | ↓         | ↓             | ↓        | ↓          | ↓                  | ↓          | ↓          | ↓                  | ↓                  | ↓           | ↓        |
| EPI Agg                  | ↓         | ↓             | ↓        | NK         | ↓                  | ↓          | NK         | ↓                  | ↓                  | ↓           | ↓        |
| COL Agg                  | ↓         | ↓             | ↓        | ↓          | N                  | ↓          | ↓          | ↓                  | ↓                  | ↓           | ↓        |
| AA Agg                   | ↓         | ↓             | NK       | ↓          | N                  | NK         | ↓          | ↓                  | ↓                  | N           | ↓        |
| TRAP Agg                 | N         | N             | NK       | N          | NK                 | NK         | NK         | NK                 | NK                 | ↓           | NK       |
| RIST Agg                 | N         | N             | N        | N          | N                  | N          | NK         | N                  | NK                 | N           | N        |
| GPIIb (CD41)             | N         | N             | N        | N          | N                  | N          | N          | N                  | N                  | NK          | N        |
| GPIIIa (CD61)            | N         | N             | NK       | N          | N                  | N          | N          | N                  | N                  | NK          | N        |
| GPIX (CD42a)             | N         | NK            | N        | N          | NK                 | NK         | N          | NK                 | NK                 | NK          | NK       |

|                                  |                         |              |                                            |                         |                         |      |                                           |                         |                         |      |      |
|----------------------------------|-------------------------|--------------|--------------------------------------------|-------------------------|-------------------------|------|-------------------------------------------|-------------------------|-------------------------|------|------|
| GP1b $\alpha$ (CD42b)            | N                       | N            | N                                          | N                       | N                       | N    | N                                         | N                       | N                       | NK   | N    |
| P-selectin exposure (CD62P)      | N                       | N            | NK                                         | N                       | NK                      | N    | NK                                        | NK                      | NK                      | NK   | NK   |
| CD63 exposure                    | N (TRAP14)              | N (TRAP14)   | NK                                         | NK                      | NK                      | NK   | NK                                        | NK                      | NK                      | NK   | NK   |
| ATP secretion                    | NK                      | NK           | NK                                         | ↓ (ADP)<br>↓ (collagen) | ↓ (ADP)<br>N (collagen) | NK   | NK                                        | N (ADP)<br>N (collagen) | ↓ (ADP)<br>N (thrombin) | NK   | NK   |
| ATP:ADP ratio                    | NK                      | NK           | NK                                         | NK                      | 1.7 (N)                 | NK   | NK                                        | 1.57 (N)                | NK                      | NK   | NK   |
| PFA100 (ADP/coll) (s)            | NK                      | NK           | NK                                         | NK                      | 279 (↑)                 | NK   | NK                                        | 84 (N)                  | >300 (↑)                | NK   | NK   |
| PFA100 (Epi/coll) (s)            | NK                      | NK           | NK                                         | NK                      | 300 (↑)                 | NK   | NK                                        | 154 (N)                 | >300 (↑)                | NK   | NK   |
| Electron microscopy              | N                       | N            | NK                                         | Abnormal vacuoles       | NK                      | N    | N                                         | NK                      | NK                      | NK   | NK   |
| Other clinical features reported | Immune thrombocytopenia | Leucocytosis | Mental retardation, epilepsy, leucocytosis | GI angio-dysplasia      | None                    | None | Keloid scarring, intracerebral meningioma | None                    | Ulcerative colitis      | None | None |

**Clinical and laboratory characteristics of the 11 index cases with biallelic, likely pathogenic variants in *RASGRP2*.** PLT- platelet count; MPV- mean platelet volume; GI- gastrointestinal; ADP- adenosine diphosphate; EPI-epinephrine; COL-collagen; AA-arachidonic acid; TRAP-thrombin receptor agonist peptide; RIST- ristocetin; Agg- aggregation; NK- not known; N- normal; ↓- reduced; ↑ increased when compared to reference interval. \* Ethnicity was inferred from next generation sequencing data according to previously described methods.<sup>1,2</sup> The index cases from pedigrees A – H were unrelated (at least no closer than fourth degree relatives). This was determined using analysis of 30,000 common SNPs according to previously described methods.<sup>3</sup>

1. Simeoni I, Stephens JC, Hu F, et al. A high-throughput sequencing test for diagnosing inherited bleeding, thrombotic, and platelet disorders. *Blood*. 2016;127(23):2791-2803.
2. Conomos MP, Miller MB, Thornton TA. Robust inference of population structure for ancestry prediction and correction of stratification in the presence of relatedness. *Genet Epidemiol*. 2015; 39(4):276-93.
3. Conomos MP, Reiner AP, Weir BS, Thornton TA. Model-free estimation of recent genetic relatedness. *Am J Hum Genet* 2016; 98(1):127-148.
